# Supplementary material for: Characteristics of Transfer RNA-Derived Fragments Expressed during Human Renal Cell Development: The Role of Dicer in tRF Biogenesis
Source: MDPI journal article supplement (doi:10.3390/ijms23073644), 2022-03-26
Supplement: s1 [file s1]

## Supplementary material

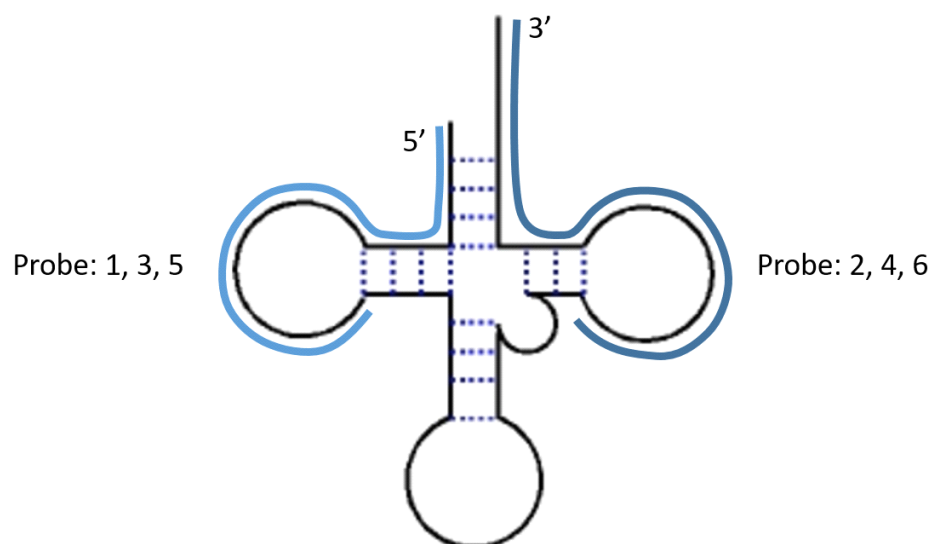

| No. | Probe name    | Sequence (5' → 3')   |
|-----|---------------|----------------------|
| 1.  | 5'tRF Gly CCC | CGTAACCACCAAGTTACCAT |
| 2.  | 3'tRF Gly CCC | AAGTTAAGGGCCGGTTACGT |
| 3.  | 5'tRF Val AAC | CAAAGGCATCACATCACCAA |
| 4.  | 3'tRF Val AAC | AAGCTTTGGCCCGCCTTTGT |
| 5.  | 5'tRF Arg CCT | CGGGGTCACCGGATTACCTA |
| 6.  | 3'tRF Arg CCT | CAAGCTCAGGGTGGACCCAC |
| 7.  | 5S RNA        | AGGGTGGTATGGCCGTAGAC |

**Table S1 Hybridization sites of DNA probes and their sequences.**

**Table S2A. Computer analysis of the possibility of kidney protein regulation by 5' tRFGly(CCC)**

| 5'tRF  | tRFdb ID | Length | Positive probability | Gene     | Protein                                                      | Function in the kidneys                                                                                                                                                                                                                              |
|--------|----------|--------|----------------------|----------|--------------------------------------------------------------|------------------------------------------------------------------------------------------------------------------------------------------------------------------------------------------------------------------------------------------------------|
| GlyCCC | 5004b    | 22 nt  | 0,8696               | MEIS2    | Homeobox protein Meis2                                       | <ul style="list-style-type: none"> <li>• Overexpression during aging and kidney damage [1]</li> <li>• Participates in nephrogenesis [2]</li> <li>• Meis1 is required for correct vascular network formation in the embryo [3]</li> </ul>             |
|        |          |        | 0,8685               | SH3TC    | SH3 domain and tetratricopeptide repeat-containing protein 2 | <ul style="list-style-type: none"> <li>• miR-584, which is located within the SH3TC intron, is a tumor suppressor, directly targeting the Rock-1 oncogene and reducing the invasion capacity in human clear cell renal cell carcinoma [4]</li> </ul> |
|        |          |        | 0,7550               | FMN1     | Formin-1                                                     | <ul style="list-style-type: none"> <li>• Genomic rearrangements of the FMN1 locus cause kidney defects [5]</li> <li>• Associated with acrorenal disorders [6]</li> </ul>                                                                             |
|        |          |        | 0,7099               | CTDSP L2 | CTD small phosphatase-like protein 2                         | <ul style="list-style-type: none"> <li>• Dephosphorylation of the FoxOs protein by stimulating proteolysis during nephritis [7]</li> </ul>                                                                                                           |
|        | 5004c    | 31 nt  | 0,8077               | ZBTB20   | Zinc finger and BTB domain-containing protein 20             | <ul style="list-style-type: none"> <li>• Glucose homeostasis [8]</li> </ul>                                                                                                                                                                          |
|        |          |        | 0,7730               | KSR2     | Kinase suppressor of Ras 2                                   | <ul style="list-style-type: none"> <li>• Cell energy homeostasis [9]</li> </ul>                                                                                                                                                                      |
|        |          |        | 0,7018               | SEC62    | Translocation protein SEC62                                  | <ul style="list-style-type: none"> <li>• Part of the ER transmembrane proteins responsible for the post-translational import</li> </ul>                                                                                                              |

|  |  |  |  |  |  |                                     |
|--|--|--|--|--|--|-------------------------------------|
|  |  |  |  |  |  | of small presecretory proteins [10] |
|--|--|--|--|--|--|-------------------------------------|

**Table S2B. Computer analysis of the possibility of kidney protein regulation by 3' tRFGly(CCC)**

| 3'tRF  | tRFdb ID | Length     | Probability | Gene    | Protein                                           | Function in the kidneys                                                                                                                                                                      |
|--------|----------|------------|-------------|---------|---------------------------------------------------|----------------------------------------------------------------------------------------------------------------------------------------------------------------------------------------------|
| GlyCCC | 3027a    | tRF3b 17nt | 1,0000      | ORAI2   | Protein orai-2                                    | <ul style="list-style-type: none"> <li>Transporting the Ca<sup>2+</sup> ion[11]</li> </ul>                                                                                                   |
|        |          |            | 0,9868      | CCDC9B0 | Coiled-coil domain-containing protein 9B          | <ul style="list-style-type: none"> <li>Cell morphology, cellular assembly and organization, cellular function and maintenance [12,13]</li> </ul>                                             |
|        |          |            | 0,9854      | CYP20A1 | Cytochrome P450 20A1                              | <ul style="list-style-type: none"> <li>Involved in diabetic nephropathy [14]</li> </ul>                                                                                                      |
|        |          |            | 0,9841      | CACNG8  | Voltage-dependent calcium channel gamma-8 subunit | <ul style="list-style-type: none"> <li>Involved in transporting calcium ions [15]</li> </ul>                                                                                                 |
|        |          |            | 0,9806      | GAS7    | Growth arrest-specific protein 7                  | <ul style="list-style-type: none"> <li>Involved in proteinuria and chronic kidney disease [16]</li> </ul>                                                                                    |
|        | 3027b    | 22         | 0,9404      | PLD6    | Phospholipase D Family Member 6                   | <ul style="list-style-type: none"> <li>Member of a family of proteins correlated with Kidney Fibrosis [17]</li> </ul>                                                                        |
|        |          |            | 0,8715      | LY6G6C  | Lymphocyte antigen 6 complex locus protein G6c    | <ul style="list-style-type: none"> <li>LY6G6C belongs to a cluster of leukocyte antigen-6 (LY6) genes located in the major histocompatibility complex (MHC) class III region [18]</li> </ul> |

1. Chang-Panesso, M; Kadyrov, F.F; Machado, F.G; Kumar, A; Humphreys, B.D. Meis1 is specifically upregulated in kidney myofibroblasts during aging and injury but is not required

for kidney homeostasis or fibrotic response. *Am J Physiol Renal Physiol.* **2018**, 315 (2), F275–F290.

2. Dekel, B; Metsuyanin, S; Schmidt-Ott, K.M; Fridman, E; Jacob-Hirsch, J; Simon, A; Pinthus, J; Mor, Y; Barasch, J; Amariglio, N; et al. Multiple imprinted and stemness genes provide a link between normal and tumor progenitor cells of the developing human kidney. *Cancer Res.* **2006**, 66 (12), 6040 – 6049.
3. Azcoitia, V; Aracil, M; Martínez-A, C; Torres, M. The homeodomain protein Meis1 is essential for definitive hematopoiesis and vascular patterning in the mouse embryo. *Dev Biol.* **2005**, 280 (2), 307-320.
4. Ueno, K; Hirata, H; Shahryari, V; Chen, Y; Zaman, M.Z; Singh, K; Tabatabai, Z.L; Hinoda, Y; Dahiya, R. Tumour suppressor microRNA-584 directly targets oncogene Rock-1 and decreases invasion ability in human clear cell renal cell carcinoma. *British Journal of Cancer.* **2011**, 104, 308–315.
5. Dimitrov, B.I; Voet, T; De Smet, L; Vermeesch, J.R; Devriendt, K; Fryns, J.P; Debeer, P. Genomic rearrangements of the GREM1-FMN1 locus cause oligosyndactyly, radio-ulnar synostosis, hearing loss, renal defects syndrome and Cenani-Lenz-like non-syndromic oligosyndactyly. *J Med Genet.* **2010**, 47 (8), 569-574.
6. Natarajan, G; Jeyachandran, D; Subramaniam, B; Thanigachalam, D; Rajagopalan, A. Congenital anomalies of kidney and hand: a review. *Clin Kidney J.* **2013**, 6 (2), 144-149.
7. Liu, X; Yu, R; Sun, L; Garibotto, G; Lin, X; Wang, Y; Thomas, S.S; Li, R; Hu, Z. The nuclear phosphatase SCP4 regulates FoxO transcription factors during muscle wasting in chronic kidney disease. *Kidney Int.* **2017**, 92 (2), 336-348.
8. Zhang, Y; Xie, Z; Zhou, L; Li, L; Zhang, H; Zhou, G; Ma, X; Herrera, P.L; Liu, Z; Grusby, M.J; Zhang, W.J. The zinc finger protein ZBTB20 regulates transcription of fructose-1,6-bisphosphatase 1 and  $\beta$  cell function in mice. *Gastroenterology.* **2012**, 142 (7), 1571-1580.
9. Guo, L; Costanzo-Garvey, D.L; Smith, D.R; Neilsen, B.K; MacDonald, R.G; Lewis, R.E. Kinase Suppressor of Ras 2 (KSR2) expression in the brain regulates energy balance and glucose homeostasis. *Mol Metab.* **2016**, 6 (2), 194-205.
10. Lang, S; Benedix, J; Fedeles, S.V; Schorr, S; Schirra, C; Schäuble, N; Jalal, C; Greiner, M; Hassdenteufel, S; et al. Different effects of Sec61 $\alpha$ , Sec62 and Sec63 depletion on transport of polypeptides into the endoplasmic reticulum of mammalian cells. *J Cell Sci.* **2012**, 125 (Pt 8), 1958-1969.
11. Mercer, J.C; Dehaven, W.I; Smyth, J.T; Wedel, B; Boyles, R.R; Bird, G.S; Putney Jr, J.W. Large store-operated calcium selective currents due to co-expression of Orai1 or Orai2 with the intracellular calcium sensor, Stim1. *J Biol Chem.* **2006**, 281, 24979-24990.
12. Sassano, A; Mavrommatis, E; Arslan, A.D; Kroczyńska, B; Beauchamp, E.M; Khuon, S; Chew, T.L; Green, K.J; Munshi, H.G; et al. Human Schlafen 5 (SLFN5) Is a Regulator of Motility and Invasiveness of Renal Cell Carcinoma Cells. *Molecular and Cellular Biology.* **2015**, 35, 2684 – 2698.
13. Wang, L; Ma, S; Cui, Y; Yang, Y; Wang, D. Genes And Pathways Associated With Apparent Treatment-resistant Hypertension In Patients With Chronic Kidney Disease: An Analysis Of The Cric Study. *Hypertension.* **2020**, 76, AP125.
14. Kiyampour, F; Abedi, M; Gheisari, Y. A systematic integrative approach reveals novel microRNAs in diabetic nephropathy. *J Res Med Sci.* **2020**, 25, 1.
15. Sharma, J; Deb, B; George, I.A; Kapil, S; Coral, K; Kakkar, N; Pattanaik, S; Mandal, A.K; Mavuduru, R.S; Kumar, P. Somatic Mutations Profile of a Young Patient With Metastatic

Urothelial Carcinoma Reveals Mutations in Genes Involved in Ion Channels. *Front Oncol.* **2019**, *9*, 435

16. Wuttke, M; Wong, C.S; Wühl, E; Epting, D; Luo, L; Hoppmann, A; Doyon, A; Li, Y; et al. Genetic loci associated with renal function measures and chronic kidney disease in children: the Pediatric Investigation for Genetic Factors Linked with Renal Progression Consortium. *Nephrol Dial Transplant.* **2016**, *31*, 262-269.
17. Trivedi, P; Kumar, R.K; Iyer, A; Boswell, S; Gerarduzzi, C; Dadhania, V.P; Herbert, Z; Joshi, N; Luyendyk, J.P; et al. Targeting Phospholipase D4 Attenuates Kidney Fibrosis. *J Am Soc Nephrol.* **2017**. *28*, 3579-3589.
18. Mallya, M; Campbell, R.D; Aguado, B. Transcriptional analysis of a novel cluster of LY-6 family members in the human and mouse major histocompatibility complex: five genes with many splice forms. *Genomics.* **2002**, *80*, 113-123.

**Table S3A. Kidney protein regulation by 5'tRFVal(AAC)**

| 5'tRF    | tRFdb ID | Length         | Probability | Gene              | Protein                                               | Function in the kidneys                                                                                                                                               |
|----------|----------|----------------|-------------|-------------------|-------------------------------------------------------|-----------------------------------------------------------------------------------------------------------------------------------------------------------------------|
| Val(AAC) | 5017b    | tRF-5b<br>20nt | 1,0000      | NFIC <sup>1</sup> | Nuclear transcription factor                          | <ul style="list-style-type: none"> <li>NFIC may regulate FABP7 expression in RCC [1]</li> </ul>                                                                       |
|          |          |                | 0,9985      | GNAO1             | Guanine nucleotide-binding protein G(o) subunit alpha | <ul style="list-style-type: none"> <li>GNAO1 are likely to be involved in the regulation of RCC through G protein signal transduction [2]</li> </ul>                  |
|          |          |                | 0,9984      | HIPK2             | Homeodomain interacting protein kinase 2              | <ul style="list-style-type: none"> <li>Regulator of transcription factors, modulates growth, development, morphogenesis, and cell death in renal cells [3]</li> </ul> |

**Table S3B. Kidney protein regulation by 3'tRFVal(AAC)**

| 3'tRF    | tRFdb ID | Length         | Probability | Gene     | Protein                          | Function in the kidneys                                                                                                                                                                                       |
|----------|----------|----------------|-------------|----------|----------------------------------|---------------------------------------------------------------------------------------------------------------------------------------------------------------------------------------------------------------|
| Val(AAC) | 3008     | tRF-3b<br>17nt | 0,9946      | FOXD1    | Forkhead box protein K1          | <ul style="list-style-type: none"> <li>Foxd1 is required during kidney development [4]</li> <li>Inactivation results in the failure of nephron progenitor cell differentiation</li> </ul>                     |
|          |          |                | 0,9821      | ARHGAP45 | Rho GTPase-activating protein 45 | <ul style="list-style-type: none"> <li>Expression of ARHGAP24 results in inhibited cell proliferation [5]</li> <li>Reduces cell invasion ability</li> <li>Induces apoptosis in renal cancer cells.</li> </ul> |

|  |  |  |        |       |                                             |                                                                                                                                                   |
|--|--|--|--------|-------|---------------------------------------------|---------------------------------------------------------------------------------------------------------------------------------------------------|
|  |  |  | 0,9394 | TOX23 | TOX high mobility group box family member 2 | <ul style="list-style-type: none"> <li>The genes are linked to biological pathways involving solute transport and renal physiology [6]</li> </ul> |
|  |  |  | 0,9393 | TPCN2 | Two pore calcium channel protein 2          | <ul style="list-style-type: none"> <li>Tpcn2 mRNA expression was the highest in kidneys, liver and adipose tissue [7]</li> </ul>                  |

1. Takaoka, N. Analysis of the regulation of fatty acid binding protein 7 expression in human renal carcinoma cell lines. *BMC Mol. Biol.* **2021**, 12, 31.
2. Liu X, Wang J, Sun G. Identification of key genes and pathways in renal cell carcinoma through expression profiling data. *Kidney Blood Press Res.* 2015;40(3):288-97.
3. Fan Y, Wang N, Chuang P, He JC. Role of HIPK2 in kidney fibrosis. *Kidney Int Suppl.* 2014, 4, 97-101.
4. Fetting JL, Guay JA, Karolak MJ, Iozzo RV, Adams DC, Maridas DE, Brown AC, Oxburgh L. FOXD1 promotes nephron progenitor differentiation by repressing decorin in the embryonic kidney. *Development.* 2014 Jan;141(1):17-27.
5. Xu G, Lu X, Huang T, Fan J. ARHGAP24 inhibits cell cycle progression, induces apoptosis and suppresses invasion in renal cell carcinoma. *Oncotarget.* 2016;7(32):51829-51839.
6. Sima, C., Iordache, P., Poenaru, E., Manolescu, A., Poenaru, C., Jinga, V. Genome-wide association study of nephrolithiasis in an Eastern European population. *Int Urol Nephrol.* 53, 309–313 (2021).
7. Tunn RE Expression of two-pore channels in mammalian primary cells and tissues, and their role in adipose tissue formation and function. eTHOS 2012
